# Supplementary material
Source: MDPI journal article supplement (https://www.mdpi.com/2071-1050/16/4/1561)
Supplement: s1 [file s1]

## Supplementary Material

This supplementary material contains data used to produce figures in the article.

**Table S1: Thesaurus for all searches.** A thesaurus file, in .csv format and containing the exact data below, was imported into the VOSviewer software for each search. This informed the software of keywords with duplicate meanings and allowed them to be displayed as one node.

| Label                                        | Replace by                        |
|----------------------------------------------|-----------------------------------|
| australia                                    |                                   |
| barriers                                     |                                   |
| bim                                          |                                   |
| building materials                           |                                   |
| buildings                                    |                                   |
| built environment                            |                                   |
| c&d waste                                    | construction and demolition waste |
| c&dw                                         | construction and demolition waste |
| cdw                                          | construction and demolition waste |
| china                                        |                                   |
| circular economy                             |                                   |
| compressive strength                         |                                   |
| concrete                                     |                                   |
| construction                                 |                                   |
| construction & demolition waste              | construction and demolition waste |
| construction and demolition                  |                                   |
| construction and demolition (c&d) waste      | construction and demolition waste |
| construction and demolition waste (c&dw)     | construction and demolition waste |
| construction and demolition waste (cdw)      | construction and demolition waste |
| construction and demolition waste management |                                   |
| construction and demolition wastes           | construction and demolition waste |
| construction industry                        |                                   |
| construction materials                       |                                   |
| construction waste                           |                                   |
| construction waste management                |                                   |
| deconstruction                               |                                   |
| demolition                                   |                                   |
| demolition waste                             |                                   |
| environment                                  |                                   |
| Land fill                                    | Landfill                          |
| environmental impacts                        | environmental impact              |
| generation                                   |                                   |
| heavy metals                                 |                                   |
| hong kong                                    |                                   |
| industrial ecology                           |                                   |
| life cycle                                   | life cycle assessment             |
| lca                                          | life cycle assessment             |
| life cycle analysis                          | life cycle assessment             |
| life cycle assessment (lca)                  | life cycle assessment             |
| machine learning                             |                                   |
| management                                   |                                   |
| Building information modeling (bim)          | Building information modeling     |
| material flow analysis (mfa)                 | material flow analysis            |
| municipal solid waste                        |                                   |
| quantification                               |                                   |
| recovery                                     |                                   |
| recycle                                      |                                   |
| aggregates                                   | aggregate                         |
| recycled aggregate concrete                  | recycled aggregate                |

|                                   |                           |
|-----------------------------------|---------------------------|
| recycled aggregates               | recycled aggregate        |
| recycled concrete                 | recycled aggregate        |
| recycled concrete aggregate       | recycled aggregate        |
| recycling                         |                           |
| resource efficiency               |                           |
| resource recovery                 |                           |
| reuse                             |                           |
| reverse logistics                 |                           |
| review                            |                           |
| solid waste                       |                           |
| solid waste management            |                           |
| sustainability                    |                           |
| sustainable construction          |                           |
| sustainable development           |                           |
| system dynamics                   |                           |
| urban mining                      |                           |
| waste                             |                           |
| waste generation rate             |                           |
| Concrete recycling                | recycled aggregate        |
| waste management & disposal       | waste management          |
| waste disposal facility           | waste disposal facilities |
| waste minimization                | waste minimisation        |
| waste recycling                   |                           |
| waste reduction                   |                           |
| recycled aggregate concrete (rca) | recycled aggregate        |
| recycled aggregate concrete (rac) | recycled aggregate        |

**Table S2: Data for Figure 1A.** Quantity of publications per year from the search of ‘construction AND demolition AND waste AND management’ on the Scopus database. Data collected on the 13th of March 2023.

| Publication year | Quantity of publications |
|------------------|--------------------------|
| 1966             | 1                        |
| 1969             | 1                        |
| 1976             | 3                        |
| 1979             | 1                        |
| 1980             | 1                        |
| 1984             | 2                        |
| 1988             | 2                        |
| 1990             | 2                        |
| 1991             | 1                        |
| 1992             | 3                        |
| 1993             | 3                        |
| 1994             | 4                        |
| 1995             | 2                        |
| 1996             | 6                        |
| 1997             | 7                        |
| 1998             | 4                        |
| 1999             | 5                        |
| 2000             | 7                        |
| 2001             | 12                       |
| 2002             | 7                        |
| 2003             | 31                       |
| 2004             | 34                       |
| 2005             | 29                       |
| 2006             | 28                       |
| 2007             | 45                       |
| 2008             | 42                       |

|      |     |
|------|-----|
| 2009 | 46  |
| 2010 | 48  |
| 2011 | 66  |
| 2012 | 41  |
| 2013 | 69  |
| 2014 | 69  |
| 2015 | 52  |
| 2016 | 76  |
| 2017 | 85  |
| 2018 | 107 |
| 2019 | 153 |
| 2020 | 201 |
| 2021 | 196 |
| 2022 | 279 |
| 2023 | 50  |

**Table S3: Data for Figure 1B.** Data behind the overlay visualisation for the publication countries over time. Data collected from the Scopus search and sorted with the VOSviewer software.

| <b>Node Title<br/>(Country)</b> | <b>Node size<br/>(Number of<br/>publications found per<br/>country)</b> | <b>Node colour<br/>(Average Publication<br/>year)</b> | <b>Number of lines to the<br/>node<br/>(Level of corelation the<br/>publications have with<br/>one another)</b> |
|---------------------------------|-------------------------------------------------------------------------|-------------------------------------------------------|-----------------------------------------------------------------------------------------------------------------|
| China                           | 299                                                                     | 2019                                                  | 31                                                                                                              |
| United States                   | 174                                                                     | 2011                                                  | 32                                                                                                              |
| Australia                       | 161                                                                     | 2018                                                  | 24                                                                                                              |
| Spain                           | 145                                                                     | 2016                                                  | 24                                                                                                              |
| India                           | 128                                                                     | 2019                                                  | 20                                                                                                              |
| United Kingdom                  | 123                                                                     | 2014                                                  | 37                                                                                                              |
| Hong Kong                       | 121                                                                     | 2015                                                  | 18                                                                                                              |
| Brazil                          | 100                                                                     | 2016                                                  | 12                                                                                                              |
| Italy                           | 89                                                                      | 2018                                                  | 28                                                                                                              |
| Portugal                        | 66                                                                      | 2017                                                  | 23                                                                                                              |
| Germany                         | 54                                                                      | 2013                                                  | 17                                                                                                              |
| Malaysia                        | 53                                                                      | 2018                                                  | 16                                                                                                              |
| Canada                          | 49                                                                      | 2016                                                  | 16                                                                                                              |
| Japan                           | 43                                                                      | 2017                                                  | 10                                                                                                              |
| Netherlands                     | 37                                                                      | 2014                                                  | 16                                                                                                              |
| France                          | 35                                                                      | 2018                                                  | 23                                                                                                              |
| Iran                            | 29                                                                      | 2017                                                  | 8                                                                                                               |
| South Korea                     | 28                                                                      | 2017                                                  | 5                                                                                                               |
| Romania                         | 24                                                                      | 2017                                                  | 3                                                                                                               |
| Sweden                          | 24                                                                      | 2015                                                  | 8                                                                                                               |
| Belgium                         | 23                                                                      | 2016                                                  | 10                                                                                                              |
| Denmark                         | 22                                                                      | 2015                                                  | 9                                                                                                               |
| Egypt                           | 21                                                                      | 2020                                                  | 12                                                                                                              |
| Greece                          | 20                                                                      | 2014                                                  | 10                                                                                                              |
| Poland                          | 20                                                                      | 2020                                                  | 13                                                                                                              |
| Austria                         | 19                                                                      | 2017                                                  | 14                                                                                                              |
| South Africa                    | 19                                                                      | 2017                                                  | 4                                                                                                               |
| Switzerland                     | 19                                                                      | 2015                                                  | 21                                                                                                              |
| Turkey                          | 18                                                                      | 2018                                                  | 3                                                                                                               |
| Russian Federation              | 17                                                                      | 2019                                                  | 8                                                                                                               |
| Thailand                        | 16                                                                      | 2016                                                  | 7                                                                                                               |
| Finland                         | 15                                                                      | 2018                                                  | 9                                                                                                               |
| Saudi Arabia                    | 15                                                                      | 2021                                                  | 12                                                                                                              |

|                      |    |      |    |
|----------------------|----|------|----|
| Taiwan               | 15 | 2015 | 4  |
| Colombia             | 14 | 2018 | 6  |
| Lebanon              | 14 | 2017 | 3  |
| Norway               | 14 | 2016 | 8  |
| Czech Republic       | 13 | 2021 | 12 |
| Viet Nam             | 13 | 2020 | 10 |
| Ireland              | 12 | 2013 | 14 |
| Pakistan             | 11 | 2018 | 8  |
| Argentina            | 10 | 2018 | 5  |
| Chile                | 10 | 2018 | 6  |
| Nigeria              | 10 | 2017 | 6  |
| Sri Lanka            | 10 | 2018 | 2  |
| New Zealand          | 9  | 2019 | 1  |
| Mexico               | 8  | 2017 | 5  |
| United Arab Emirates | 8  | 2020 | 11 |
| Serbia               | 7  | 2017 | 6  |
| Singapore            | 7  | 2017 | 14 |
| Iraq                 | 6  | 2019 | 5  |
| Cyprus               | 5  | 2013 | 3  |
| Kazakhstan           | 5  | 2020 | 3  |
| Luxembourg           | 5  | 2018 | 1  |
| Qatar                | 5  | 2020 | 2  |

**Table S4: Data for Figures 1C and 1D.** Data behind the visualisation of the co-occurrence between keywords (Figure 1C) and for the overlay visualisation of keyword occurrence over time (Figure 1D). Data collected from the Scopus search and sorted with the VOSviewer software.

| <b>Node Title<br/>(Keyword)</b>   | <b>Node size<br/>(Number of<br/>times the<br/>keyword occurs<br/>across all<br/>publications)</b> | <b>Number of lines<br/>to the node<br/>(Level of<br/>corelation the<br/>keywords have<br/>with one<br/>another)</b> | <b>Figure 1C node<br/>colour<br/>(Cluster –<br/>Keywords with<br/>similar subjects)</b> | <b>Figure 1D node<br/>colour<br/>(Average<br/>Publication year)</b> |
|-----------------------------------|---------------------------------------------------------------------------------------------------|---------------------------------------------------------------------------------------------------------------------|-----------------------------------------------------------------------------------------|---------------------------------------------------------------------|
| Construction and demolition waste | 554                                                                                               | 48                                                                                                                  | 1 (Red)                                                                                 | 2017                                                                |
| Waste management                  | 300                                                                                               | 40                                                                                                                  | 4 (Yellow)                                                                              | 2017                                                                |
| Life cycle assessment             | 130                                                                                               | 30                                                                                                                  | 4                                                                                       | 2018                                                                |
| Recycled aggregate                | 120                                                                                               | 19                                                                                                                  | 3 (Green)                                                                               | 2017                                                                |
| Environmental impact              | 39                                                                                                | 14                                                                                                                  | 2                                                                                       | 2016                                                                |
| Material flow analysis            | 35                                                                                                | 12                                                                                                                  | 2                                                                                       | 2017                                                                |
| Waste minimisation                | 27                                                                                                | 10                                                                                                                  | 1                                                                                       | 2015                                                                |
| Aggregate                         | 17                                                                                                | 6                                                                                                                   | 2                                                                                       | 2015                                                                |
| Building information modeling     | 16                                                                                                | 7                                                                                                                   | 1                                                                                       | 2019                                                                |
| Disposal                          | 9                                                                                                 | 7                                                                                                                   | 3                                                                                       | 2014                                                                |
| Fly ash                           | 9                                                                                                 | 3                                                                                                                   | 3                                                                                       | 2016                                                                |
| Leaching                          | 9                                                                                                 | 7                                                                                                                   | 2                                                                                       | 2013                                                                |
| Selective demolition              | 9                                                                                                 | 6                                                                                                                   | 1                                                                                       | 2017                                                                |
| Urbanization                      | 9                                                                                                 | 6                                                                                                                   | 2                                                                                       | 2018                                                                |
| Carbon emission                   | 8                                                                                                 | 3                                                                                                                   | 2                                                                                       | 2018                                                                |
| Environmental assessment          | 8                                                                                                 | 5                                                                                                                   | 3                                                                                       | 2018                                                                |
| Material recovery                 | 8                                                                                                 | 5                                                                                                                   | 1                                                                                       | 2017                                                                |
| Mechanical properties             | 8                                                                                                 | 6                                                                                                                   | 3                                                                                       | 2019                                                                |
| Risk assessment                   | 8                                                                                                 | 5                                                                                                                   | 2                                                                                       | 2013                                                                |
| Strength                          | 8                                                                                                 | 5                                                                                                                   | 3                                                                                       | 2012                                                                |

|                                    |   |   |   |      |
|------------------------------------|---|---|---|------|
| Urban metabolism                   | 8 | 3 | 2 | 2020 |
| Waste disposal                     | 8 | 4 | 1 | 2014 |
| Water absorption                   | 8 | 4 | 3 | 2019 |
| Construction and demolition debris | 7 | 3 | 2 | 2010 |
| Construction demolition waste      | 7 | 3 | 4 | 2020 |
| Demolition waste management        | 7 | 5 | 1 | 2020 |
| Design                             | 7 | 6 | 1 | 2017 |
| Developing countries               | 7 | 2 | 4 | 2021 |
| Environmental management           | 7 | 3 | 3 | 2015 |
| Green building                     | 7 | 1 | 4 | 2020 |
| Gypsum                             | 7 | 2 | 2 | 2018 |
| Incineration                       | 7 | 6 | 1 | 2017 |
| Landfilling                        | 7 | 6 | 1 | 2019 |
| Renovation                         | 7 | 6 | 1 | 2011 |
| Waste composition                  | 7 | 4 | 1 | 2018 |
| Zero waste                         | 7 | 4 | 1 | 2019 |
| Cement                             | 6 | 6 | 2 | 2018 |
| Composting                         | 6 | 5 | 3 | 2013 |
| Copper                             | 6 | 5 | 3 | 2005 |
| Cost-benefit analysis              | 6 | 5 | 1 | 2016 |
| Embodied energy                    | 6 | 6 | 3 | 2016 |
| Environmental impact assessment    | 6 | 4 | 1 | 2019 |
| Environmental sustainability       | 6 | 4 | 3 | 2021 |
| Illegal dumping                    | 6 | 1 | 4 | 2019 |
| Landfills                          | 6 | 3 | 3 | 2011 |
| Life-cycle assessment              | 6 | 4 | 2 | 2019 |
| Recycled concrete aggregates       | 6 | 5 | 4 | 2016 |
| Recycled materials                 | 6 | 5 | 4 | 2014 |
| Resource management                | 6 | 3 | 2 | 2015 |
| Separation                         | 6 | 3 | 1 | 2012 |
| Strategies                         | 6 | 6 | 1 | 2019 |
| Sustainable waste management       | 6 | 4 | 1 | 2020 |
| Urban planning                     | 6 | 6 | 2 | 2015 |
| Waste generation                   | 6 | 2 | 4 | 2011 |
| Waste quantification               | 6 | 4 | 1 | 2018 |
| Wood waste                         | 6 | 3 | 3 | 2016 |

**Table S5: Data for Figure 2A.** Quantity of publications per year from the search ‘Life Cycle assessment OR embodied energy OR carbon footprint OR green building OR living building challenge AND construction AND demolition.’ Data collected on the 6th of April 2023.

| Publication year | Quantity of publications |
|------------------|--------------------------|
| 1995             | 2                        |
| 1996             | 1                        |
| 1997             | 1                        |
| 1998             | 3                        |
| 1999             | 1                        |
| 2000             | 6                        |
| 2001             | 4                        |

|      |     |
|------|-----|
| 2002 | 4   |
| 2003 | 9   |
| 2004 | 4   |
| 2005 | 7   |
| 2006 | 12  |
| 2007 | 16  |
| 2008 | 15  |
| 2009 | 13  |
| 2010 | 26  |
| 2011 | 30  |
| 2012 | 25  |
| 2013 | 43  |
| 2014 | 51  |
| 2015 | 33  |
| 2016 | 57  |
| 2017 | 51  |
| 2018 | 69  |
| 2019 | 99  |
| 2020 | 102 |
| 2021 | 116 |
| 2022 | 158 |
| 2023 | 50  |

**Table S6: Data for Figure 2B.** Data behind the overlay visualisation for the publication countries over time. Data collected from the Scopus search and sorted with the VOSviewer software.

| <b>Node Title<br/>(Country)</b> | <b>Node size<br/>(Number of<br/>publications found per<br/>country)</b> | <b>Node colour<br/>(Average Publication<br/>year)</b> | <b>Number of lines to the<br/>node<br/>(Level of corelation the<br/>publications have with<br/>one another)</b> |
|---------------------------------|-------------------------------------------------------------------------|-------------------------------------------------------|-----------------------------------------------------------------------------------------------------------------|
| China                           | 155                                                                     | 2018                                                  | 21                                                                                                              |
| United states                   | 119                                                                     | 2014                                                  | 23                                                                                                              |
| Italy                           | 98                                                                      | 2018                                                  | 17                                                                                                              |
| Australia                       | 79                                                                      | 2018                                                  | 16                                                                                                              |
| India                           | 69                                                                      | 2020                                                  | 11                                                                                                              |
| Spain                           | 69                                                                      | 2018                                                  | 15                                                                                                              |
| United Kingdom                  | 57                                                                      | 2017                                                  | 19                                                                                                              |
| Germany                         | 37                                                                      | 2017                                                  | 12                                                                                                              |
| Brazil                          | 34                                                                      | 2019                                                  | 15                                                                                                              |
| Canada                          | 33                                                                      | 2016                                                  | 7                                                                                                               |
| Portugal                        | 30                                                                      | 2019                                                  | 7                                                                                                               |
| France                          | 27                                                                      | 2017                                                  | 13                                                                                                              |
| Hong Kong                       | 26                                                                      | 2016                                                  | 4                                                                                                               |
| Turkey                          | 25                                                                      | 2020                                                  | 3                                                                                                               |
| Netherlands                     | 22                                                                      | 2016                                                  | 12                                                                                                              |
| Switzerland                     | 22                                                                      | 2019                                                  | 10                                                                                                              |
| Belgium                         | 21                                                                      | 2018                                                  | 8                                                                                                               |
| Malaysia                        | 20                                                                      | 2020                                                  | 11                                                                                                              |
| Denmark                         | 18                                                                      | 2018                                                  | 8                                                                                                               |
| Poland                          | 18                                                                      | 2019                                                  | 5                                                                                                               |
| Czech Republic                  | 17                                                                      | 2019                                                  | 5                                                                                                               |
| Japan                           | 17                                                                      | 2014                                                  | 7                                                                                                               |
| Finland                         | 16                                                                      | 2018                                                  | 6                                                                                                               |
| South Korea                     | 16                                                                      | 2016                                                  | 5                                                                                                               |
| Sweden                          | 15                                                                      | 2014                                                  | 7                                                                                                               |
| Iran                            | 14                                                                      | 2020                                                  | 7                                                                                                               |

|                    |    |      |   |
|--------------------|----|------|---|
| Thailand           | 14 | 2017 | 7 |
| Romania            | 13 | 2018 | 7 |
| Egypt              | 12 | 2019 | 5 |
| Greece             | 11 | 2017 | 4 |
| Russian federation | 11 | 2020 | 5 |
| Saudi Arabia       | 11 | 2021 | 9 |
| Austria            | 10 | 2020 | 4 |
| Colombia           | 10 | 2020 | 3 |

**Table S7: Data for Figures 2C and 2D.** Data behind the visualisation of the co-occurrence between keywords (Figure 2C) and for the overlay visualisation of keyword occurrence over time (Figure 2D). Data collected from the Scopus search and sorted with the VOSviewer software.

| <b>Node Title<br/>(Keyword)</b>      | <b>Node size<br/>(Number of<br/>times the<br/>keyword occurs<br/>across all<br/>publications)</b> | <b>Number of lines<br/>to the node<br/>(Level of<br/>corelation the<br/>keywords have<br/>with one<br/>another)</b> | <b>Figure 2C node<br/>colour<br/>(Cluster –<br/>Keywords with<br/>similar subjects)</b> | <b>Figure 2D node<br/>colour<br/>(Average<br/>Publication year)</b> |
|--------------------------------------|---------------------------------------------------------------------------------------------------|---------------------------------------------------------------------------------------------------------------------|-----------------------------------------------------------------------------------------|---------------------------------------------------------------------|
| Life cycle assessment                | 599                                                                                               | 27                                                                                                                  | 1 (Red)                                                                                 | 2017                                                                |
| Environmental impact                 | 338                                                                                               | 27                                                                                                                  | 1                                                                                       | 2016                                                                |
| Construction and<br>demolition waste | 293                                                                                               | 27                                                                                                                  | 2 (Green)                                                                               | 2019                                                                |
| Waste management                     | 188                                                                                               | 27                                                                                                                  | 2                                                                                       | 2018                                                                |
| Recycled aggregate                   | 120                                                                                               | 24                                                                                                                  | 3 (Blue)                                                                                | 2019                                                                |
| Carbon footprint                     | 118                                                                                               | 26                                                                                                                  | 1                                                                                       | 2019                                                                |
| Carbon dioxide                       | 108                                                                                               | 27                                                                                                                  | 1                                                                                       | 2017                                                                |
| Energy utilization                   | 100                                                                                               | 27                                                                                                                  | 1                                                                                       | 2016                                                                |
| Concrete aggregates                  | 97                                                                                                | 25                                                                                                                  | 3                                                                                       | 2019                                                                |
| Aggregate                            | 86                                                                                                | 26                                                                                                                  | 3                                                                                       | 2018                                                                |
| Building material                    | 86                                                                                                | 27                                                                                                                  | 2                                                                                       | 2018                                                                |
| Greenhouse gases                     | 86                                                                                                | 27                                                                                                                  | 1                                                                                       | 2018                                                                |
| Global warming                       | 85                                                                                                | 27                                                                                                                  | 1                                                                                       | 2017                                                                |
| Building                             | 82                                                                                                | 27                                                                                                                  | 1                                                                                       | 2017                                                                |
| Concretes                            | 80                                                                                                | 27                                                                                                                  | 3                                                                                       | 2017                                                                |
| Waste disposal                       | 79                                                                                                | 27                                                                                                                  | 2                                                                                       | 2016                                                                |
| Environmental<br>management          | 77                                                                                                | 26                                                                                                                  | 3                                                                                       | 2017                                                                |
| Landfill                             | 73                                                                                                | 27                                                                                                                  | 2                                                                                       | 2016                                                                |
| Energy efficiency                    | 68                                                                                                | 26                                                                                                                  | 1                                                                                       | 2017                                                                |
| Environmental impact<br>assessment   | 65                                                                                                | 26                                                                                                                  | 2                                                                                       | 2015                                                                |
| Architectural design                 | 61                                                                                                | 26                                                                                                                  | 1                                                                                       | 2018                                                                |
| Building industry                    | 56                                                                                                | 27                                                                                                                  | 2                                                                                       | 2018                                                                |
| Housing                              | 56                                                                                                | 24                                                                                                                  | 1                                                                                       | 2016                                                                |
| Carbon                               | 54                                                                                                | 27                                                                                                                  | 1                                                                                       | 2019                                                                |
| Carbon emission                      | 50                                                                                                | 25                                                                                                                  | 1                                                                                       | 2018                                                                |
| Embodied energy                      | 50                                                                                                | 25                                                                                                                  | 1                                                                                       | 2016                                                                |
| Decision making                      | 49                                                                                                | 25                                                                                                                  | 2                                                                                       | 2018                                                                |
| Gas emissions                        | 49                                                                                                | 27                                                                                                                  | 1                                                                                       | 2018                                                                |

**Table S8: Data for Figure 3A.** Quantity of publications per year from the search of ‘Reuse OR recycle OR reclaim OR (salvaged AND material) OR upcycle AND construction AND demolition’ on the Scopus database. Data collected on the 29th May 2023.

| <b>Publication year</b> | <b>Quantity of publications</b> |
|-------------------------|---------------------------------|
| 1976                    | 1                               |
| 1977                    | 0                               |
| 1978                    | 0                               |
| 1979                    | 1                               |
| 1980                    | 0                               |
| 1981                    | 0                               |
| 1982                    | 0                               |
| 1983                    | 0                               |
| 1984                    | 1                               |
| 1985                    | 0                               |
| 1986                    | 0                               |
| 1987                    | 0                               |
| 1988                    | 0                               |
| 1989                    | 0                               |
| 1990                    | 1                               |
| 1991                    | 1                               |
| 1992                    | 0                               |
| 1993                    | 1                               |
| 1994                    | 1                               |
| 1995                    | 1                               |
| 1996                    | 5                               |
| 1997                    | 3                               |
| 1998                    | 5                               |
| 1999                    | 2                               |
| 2000                    | 5                               |
| 2001                    | 16                              |
| 2002                    | 4                               |
| 2003                    | 12                              |
| 2004                    | 19                              |
| 2005                    | 13                              |
| 2006                    | 17                              |
| 2007                    | 26                              |
| 2008                    | 28                              |
| 2009                    | 16                              |
| 2010                    | 28                              |
| 2011                    | 32                              |
| 2012                    | 34                              |
| 2013                    | 33                              |
| 2014                    | 51                              |
| 2015                    | 31                              |
| 2016                    | 41                              |
| 2017                    | 57                              |
| 2018                    | 79                              |
| 2019                    | 93                              |
| 2020                    | 95                              |
| 2021                    | 119                             |
| 2022                    | 150                             |
| 2023                    | 59                              |



**Table S9: Data for Figure 3B.** Data behind the overlay visualisation for the publication countries over time. Data collected from the Scopus search and sorted with the VOSviewer software.

| <b>Node Title<br/>(Country)</b> | <b>Node size<br/>(Number of<br/>publications found per<br/>country)</b> | <b>Node colour<br/>(Average Publication<br/>year)</b> | <b>Number of lines to the<br/>node<br/>(Level of corelation the<br/>publications have with<br/>one another)</b> |
|---------------------------------|-------------------------------------------------------------------------|-------------------------------------------------------|-----------------------------------------------------------------------------------------------------------------|
| China                           | 122                                                                     | 2018                                                  | 18                                                                                                              |
| United States                   | 109                                                                     | 2013                                                  | 18                                                                                                              |
| India                           | 99                                                                      | 2020                                                  | 14                                                                                                              |
| United Kingdom                  | 91                                                                      | 2015                                                  | 27                                                                                                              |
| Italy                           | 75                                                                      | 2018                                                  | 19                                                                                                              |
| Spain                           | 72                                                                      | 2016                                                  | 12                                                                                                              |
| Australia                       | 71                                                                      | 2016                                                  | 18                                                                                                              |
| Brazil                          | 53                                                                      | 2017                                                  | 15                                                                                                              |
| Germany                         | 43                                                                      | 2017                                                  | 11                                                                                                              |
| Netherlands                     | 41                                                                      | 2014                                                  | 15                                                                                                              |
| Japan                           | 40                                                                      | 2013                                                  | 5                                                                                                               |
| Portugal                        | 35                                                                      | 2016                                                  | 14                                                                                                              |
| Canada                          | 32                                                                      | 2015                                                  | 7                                                                                                               |
| Hong Kong                       | 31                                                                      | 2015                                                  | 5                                                                                                               |
| France                          | 24                                                                      | 2018                                                  | 18                                                                                                              |
| Malaysia                        | 22                                                                      | 2019                                                  | 7                                                                                                               |
| Belgium                         | 17                                                                      | 2018                                                  | 5                                                                                                               |
| Denmark                         | 17                                                                      | 2019                                                  | 6                                                                                                               |
| Thailand                        | 16                                                                      | 2018                                                  | 10                                                                                                              |
| Turkey                          | 15                                                                      | 2016                                                  | 7                                                                                                               |
| Poland                          | 14                                                                      | 2020                                                  | 12                                                                                                              |
| Switzerland                     | 14                                                                      | 2019                                                  | 12                                                                                                              |
| Romania                         | 13                                                                      | 2018                                                  | 3                                                                                                               |
| Sweden                          | 13                                                                      | 2018                                                  | 10                                                                                                              |
| Greece                          | 12                                                                      | 2015                                                  | 1                                                                                                               |
| Czech Republic                  | 11                                                                      | 2020                                                  | 8                                                                                                               |
| Finland                         | 11                                                                      | 2016                                                  | 8                                                                                                               |
| Russian Federation              | 11                                                                      | 2020                                                  | 5                                                                                                               |
| South Africa                    | 11                                                                      | 2019                                                  | 3                                                                                                               |
| Viet Nam                        | 11                                                                      | 2021                                                  | 8                                                                                                               |
| Austria                         | 10                                                                      | 2018                                                  | 7                                                                                                               |
| Colombia                        | 10                                                                      | 2020                                                  | 2                                                                                                               |
| Egypt                           | 10                                                                      | 2019                                                  | 4                                                                                                               |
| Iran                            | 10                                                                      | 2018                                                  | 4                                                                                                               |
| Nigeria                         | 10                                                                      | 2017                                                  | 4                                                                                                               |

**Table S10: Data for Figures 3C and 3D.** Data behind the visualisation of the co-occurrence between keywords (Figure 3C) and for the overlay visualisation of keyword occurrence over time (Figure 3D). Data collected from the Scopus search and sorted with the VOSviewer software.

| <b>Node Title<br/>(Keyword)</b>      | <b>Node size<br/>(Number of<br/>times the<br/>keyword occurs<br/>across all<br/>publications)</b> | <b>Number of lines<br/>to the node<br/>(Level of<br/>corelation the<br/>keywords have<br/>with one<br/>another)</b> | <b>Figure 3C node<br/>colour<br/>(Cluster –<br/>Keywords with<br/>similar subjects)</b> | <b>Figure 3D node<br/>colour<br/>(Average<br/>Publication year)</b> |
|--------------------------------------|---------------------------------------------------------------------------------------------------|---------------------------------------------------------------------------------------------------------------------|-----------------------------------------------------------------------------------------|---------------------------------------------------------------------|
| Construction and<br>demolition waste | 424                                                                                               | 30                                                                                                                  | 4 (Yellow)                                                                              | 2018                                                                |

|                              |     |    |           |      |
|------------------------------|-----|----|-----------|------|
| Waste management             | 239 | 30 | 1 (Red)   | 2015 |
| Concrete aggregates          | 185 | 30 | 2 (Green) | 2017 |
| Recycled aggregate           | 175 | 30 | 2         | 2017 |
| Concretes                    | 143 | 30 | 2         | 2015 |
| Aggregate                    | 137 | 29 | 2         | 2016 |
| Life cycle assessment        | 133 | 29 | 3 (Blue)  | 2017 |
| Waste disposal               | 129 | 30 | 1         | 2014 |
| Environmental impact         | 122 | 30 | 3         | 2015 |
| Landfill                     | 109 | 28 | 1         | 2012 |
| Article                      | 101 | 30 | 1         | 2015 |
| Construction wastes          | 65  | 30 | 1         | 2016 |
| Demolition wastes            | 60  | 30 | 2         | 2016 |
| Building material            | 57  | 28 | 1         | 2014 |
| Recycled concrete aggregates | 50  | 24 | 2         | 2018 |
| Industrial waste             | 48  | 30 | 1         | 2016 |
| Charge density waves         | 47  | 29 | 4         | 2017 |
| Debris                       | 47  | 27 | 3         | 2012 |
| Water absorption             | 47  | 24 | 2         | 2018 |
| Mechanical properties        | 44  | 21 | 2         | 2017 |
| Building industry            | 43  | 26 | 1         | 2016 |
| Durability                   | 40  | 24 | 2         | 2016 |
| Waste treatment              | 40  | 29 | 1         | 2016 |
| Brick                        | 38  | 26 | 2         | 2017 |
| Cements                      | 38  | 29 | 2         | 2016 |
| Project management           | 38  | 22 | 1         | 2012 |
| Decision making              | 37  | 24 | 1         | 2017 |
| Construction material        | 36  | 26 | 3         | 2015 |
| Greenhouse gases             | 35  | 26 | 3         | 2018 |
| Reuse and recycling          | 35  | 25 | 4         | 2016 |
| Solid wastes                 | 35  | 24 | 1         | 2012 |

**Table S11: Data for Figure 4A.** Quantity of publications per year from the search of ‘Refurbishment OR renovation OR (heritage AND restoration) AND building AND construction’ on the Scopus database. Data collected on the 29th May 2023.

| Publication year | Quantity of publications |
|------------------|--------------------------|
| 1960             | 1                        |
| 1972             | 1                        |
| 1974             | 4                        |
| 1975             | 3                        |
| 1976             | 3                        |
| 1977             | 1                        |
| 1978             | 5                        |
| 1979             | 4                        |
| 1980             | 4                        |
| 1981             | 7                        |
| 1982             | 2                        |
| 1983             | 8                        |
| 1984             | 15                       |
| 1985             | 20                       |
| 1986             | 25                       |
| 1987             | 13                       |
| 1988             | 16                       |
| 1989             | 17                       |
| 1990             | 15                       |
| 1991             | 18                       |

|      |     |
|------|-----|
| 1992 | 16  |
| 1993 | 12  |
| 1994 | 13  |
| 1995 | 19  |
| 1996 | 27  |
| 1997 | 21  |
| 1998 | 20  |
| 1999 | 35  |
| 2000 | 34  |
| 2001 | 30  |
| 2002 | 29  |
| 2003 | 44  |
| 2004 | 55  |
| 2005 | 70  |
| 2006 | 101 |
| 2007 | 86  |
| 2008 | 95  |
| 2009 | 114 |
| 2010 | 102 |
| 2011 | 144 |
| 2012 | 153 |
| 2013 | 237 |
| 2014 | 226 |
| 2015 | 239 |
| 2016 | 261 |
| 2017 | 293 |
| 2018 | 309 |
| 2019 | 406 |
| 2020 | 353 |
| 2021 | 405 |
| 2022 | 407 |
| 2023 | 127 |

**Table S12: Data for Figure 4B.** Data behind the overlay visualisation for the publication countries over time. Data collected from the Scopus search and sorted with the VOSviewer software.

| <b>Node Title<br/>(Country)</b> | <b>Node size<br/>(Number of<br/>publications found per<br/>country)</b> | <b>Node colour<br/>(Average Publication<br/>year)</b> | <b>Number of lines to the<br/>node<br/>(Level of corelation the<br/>publications have with<br/>one another)</b> |
|---------------------------------|-------------------------------------------------------------------------|-------------------------------------------------------|-----------------------------------------------------------------------------------------------------------------|
| Italy                           | 575                                                                     | 2018                                                  | 22                                                                                                              |
| United States                   | 554                                                                     | 2009                                                  | 27                                                                                                              |
| Spain                           | 328                                                                     | 2017                                                  | 23                                                                                                              |
| United Kingdom                  | 302                                                                     | 2013                                                  | 25                                                                                                              |
| Germany                         | 258                                                                     | 2014                                                  | 19                                                                                                              |
| Russian Federation              | 140                                                                     | 2019                                                  | 6                                                                                                               |
| Poland                          | 128                                                                     | 2017                                                  | 12                                                                                                              |
| Portugal                        | 115                                                                     | 2017                                                  | 16                                                                                                              |
| Netherlands                     | 105                                                                     | 2015                                                  | 21                                                                                                              |
| France                          | 103                                                                     | 2016                                                  | 10                                                                                                              |
| Finland                         | 100                                                                     | 2012                                                  | 18                                                                                                              |
| Japan                           | 93                                                                      | 2015                                                  | 8                                                                                                               |
| Turkey                          | 88                                                                      | 2016                                                  | 6                                                                                                               |
| Sweden                          | 87                                                                      | 2016                                                  | 13                                                                                                              |
| Canada                          | 84                                                                      | 2012                                                  | 10                                                                                                              |
| Belgium                         | 83                                                                      | 2017                                                  | 15                                                                                                              |

|                |    |      |    |
|----------------|----|------|----|
| Austria        | 81 | 2016 | 16 |
| Denmark        | 74 | 2016 | 16 |
| Czech Republic | 71 | 2017 | 8  |
| Switzerland    | 68 | 2017 | 12 |
| Greece         | 59 | 2017 | 14 |
| India          | 59 | 2017 | 3  |
| Lithuania      | 55 | 2011 | 6  |
| South Korea    | 54 | 2018 | 4  |
| Malaysia       | 53 | 2017 | 4  |
| Norway         | 51 | 2017 | 16 |
| Hungary        | 41 | 2014 | 5  |
| Slovakia       | 35 | 2016 | 8  |
| Slovenia       | 35 | 2015 | 8  |
| Iran           | 33 | 2018 | 7  |
| Taiwan         | 33 | 2015 | 2  |
| Brazil         | 29 | 2018 | 9  |
| Ireland        | 25 | 2017 | 9  |
| Latvia         | 24 | 2016 | 6  |
| New Zealand    | 24 | 2016 | 4  |
| Serbia         | 24 | 2017 | 6  |

**Table S13: Data for Figures 4C and 4D.** Data behind the visualisation of the co-occurrence between keywords (Figure 4C) and for the overlay visualisation of keyword occurrence over time (Figure 4D). Data collected from the Scopus search and sorted with the VOSviewer software.

| <b>Node Title<br/>(Keyword)</b>  | <b>Node size<br/>(Number of<br/>times the<br/>keyword occurs<br/>across all<br/>publications)</b> | <b>Number of lines<br/>to the node<br/>(Level of<br/>corelation the<br/>keywords have<br/>with one<br/>another)</b> | <b>Figure 4C node<br/>colour<br/>(Cluster –<br/>Keywords with<br/>similar subjects)</b> | <b>Figure 4D node<br/>colour<br/>(Average<br/>Publication year)</b> |
|----------------------------------|---------------------------------------------------------------------------------------------------|---------------------------------------------------------------------------------------------------------------------|-----------------------------------------------------------------------------------------|---------------------------------------------------------------------|
| Energy efficiency                | 632                                                                                               | 31                                                                                                                  | 2 (Green)                                                                               | 2017                                                                |
| Architectural design             | 395                                                                                               | 31                                                                                                                  | 1 (Red)                                                                                 | 2016                                                                |
| Housing                          | 339                                                                                               | 31                                                                                                                  | 2                                                                                       | 2016                                                                |
| Life cycle assessment            | 338                                                                                               | 31                                                                                                                  | 3 (Blue)                                                                                | 2018                                                                |
| Energy utilization               | 325                                                                                               | 30                                                                                                                  | 2                                                                                       | 2016                                                                |
| Building                         | 297                                                                                               | 31                                                                                                                  | 3                                                                                       | 2016                                                                |
| Restoration                      | 287                                                                                               | 31                                                                                                                  | 1                                                                                       | 2015                                                                |
| Historic preservation            | 265                                                                                               | 31                                                                                                                  | 1                                                                                       | 2017                                                                |
| Renovation                       | 259                                                                                               | 30                                                                                                                  | 1                                                                                       | 2014                                                                |
| Energy conservation              | 236                                                                                               | 31                                                                                                                  | 2                                                                                       | 2015                                                                |
| Retrofitting                     | 223                                                                                               | 31                                                                                                                  | 2                                                                                       | 2015                                                                |
| Refurbishment                    | 220                                                                                               | 31                                                                                                                  | 3                                                                                       | 2014                                                                |
| Environmental impact             | 198                                                                                               | 31                                                                                                                  | 3                                                                                       | 2016                                                                |
| Office buildings                 | 188                                                                                               | 30                                                                                                                  | 3                                                                                       | 2014                                                                |
| Structural design                | 182                                                                                               | 31                                                                                                                  | 1                                                                                       | 2011                                                                |
| Architecture                     | 179                                                                                               | 31                                                                                                                  | 1                                                                                       | 2015                                                                |
| Residential building             | 175                                                                                               | 30                                                                                                                  | 2                                                                                       | 2017                                                                |
| Walls (structural<br>partitions) | 175                                                                                               | 30                                                                                                                  | 1                                                                                       | 2015                                                                |
| Project management               | 170                                                                                               | 31                                                                                                                  | 3                                                                                       | 2012                                                                |
| Building construction            | 160                                                                                               | 30                                                                                                                  | 3                                                                                       | 2015                                                                |
| Maintenance                      | 152                                                                                               | 31                                                                                                                  | 1                                                                                       | 2014                                                                |
| Investments                      | 147                                                                                               | 31                                                                                                                  | 2                                                                                       | 2017                                                                |
| Costs                            | 146                                                                                               | 30                                                                                                                  | 2                                                                                       | 2014                                                                |
| Building renovation              | 145                                                                                               | 30                                                                                                                  | 3                                                                                       | 2016                                                                |

|                       |     |    |   |      |
|-----------------------|-----|----|---|------|
| Decision making       | 141 | 29 | 3 | 2017 |
| Cultural heritage     | 140 | 24 | 1 | 2017 |
| Concrete construction | 139 | 28 | 1 | 2010 |
| Thermal insulation    | 135 | 30 | 2 | 2016 |
| Intelligent buildings | 127 | 30 | 3 | 2016 |
| Heating               | 122 | 30 | 2 | 2014 |
| Reinforced concrete   | 121 | 29 | 1 | 2015 |
| Ventilation           | 120 | 28 | 2 | 2011 |

**Table S14: Data for Figure 5A.** Quantity of publications per year from the search of ‘Circular economy OR closing the loop OR zero waste OR narrowing the loop AND construction OR demolition’ on the Scopus database. Data collected on the 29th May 2023.

| Publication year | Quantity of publications |
|------------------|--------------------------|
| 1973             | 2                        |
| 1974             | 4                        |
| 1975             | 4                        |
| 1977             | 2                        |
| 1978             | 2                        |
| 1979             | 4                        |
| 1980             | 2                        |
| 1981             | 1                        |
| 1983             | 3                        |
| 1984             | 2                        |
| 1985             | 6                        |
| 1986             | 2                        |
| 1987             | 2                        |
| 1988             | 3                        |
| 1989             | 1                        |
| 1990             | 1                        |
| 1991             | 2                        |
| 1992             | 3                        |
| 1993             | 4                        |
| 1994             | 1                        |
| 1995             | 4                        |
| 1996             | 3                        |
| 1997             | 3                        |
| 1998             | 4                        |
| 1999             | 4                        |
| 2000             | 10                       |
| 2001             | 5                        |
| 2002             | 10                       |
| 2003             | 12                       |
| 2004             | 5                        |
| 2005             | 21                       |
| 2006             | 21                       |
| 2007             | 28                       |
| 2008             | 24                       |
| 2009             | 31                       |
| 2010             | 35                       |
| 2011             | 56                       |
| 2012             | 55                       |
| 2013             | 58                       |
| 2014             | 65                       |
| 2015             | 46                       |
| 2016             | 74                       |
| 2017             | 104                      |

|      |     |
|------|-----|
| 2018 | 163 |
| 2019 | 277 |
| 2020 | 409 |
| 2021 | 613 |
| 2022 | 728 |
| 2023 | 316 |

**Table S15: Data for Figure 5B.** Data behind the overlay visualisation for the publication countries over time. Data collected from the Scopus search and sorted with the VOSviewer software.

| <b>Node Title<br/>(Country)</b> | <b>Node size<br/>(Number of<br/>publications found per<br/>country)</b> | <b>Node colour<br/>(Average Publication<br/>year)</b> | <b>Number of lines to the<br/>node<br/>(Level of corelation the<br/>publications have with<br/>one another)</b> |
|---------------------------------|-------------------------------------------------------------------------|-------------------------------------------------------|-----------------------------------------------------------------------------------------------------------------|
| Italy                           | 293                                                                     | 2020                                                  | 29                                                                                                              |
| United Kingdom                  | 260                                                                     | 2020                                                  | 31                                                                                                              |
| Spain                           | 247                                                                     | 2020                                                  | 23                                                                                                              |
| United States                   | 244                                                                     | 2015                                                  | 31                                                                                                              |
| Germany                         | 184                                                                     | 2019                                                  | 29                                                                                                              |
| India                           | 160                                                                     | 2020                                                  | 27                                                                                                              |
| Netherlands                     | 126                                                                     | 2020                                                  | 25                                                                                                              |
| Portugal                        | 123                                                                     | 2021                                                  | 21                                                                                                              |
| France                          | 100                                                                     | 2020                                                  | 28                                                                                                              |
| Canada                          | 97                                                                      | 2019                                                  | 21                                                                                                              |
| Brazil                          | 93                                                                      | 2020                                                  | 19                                                                                                              |
| Denmark                         | 83                                                                      | 2020                                                  | 24                                                                                                              |
| Poland                          | 82                                                                      | 2020                                                  | 20                                                                                                              |
| Belgium                         | 77                                                                      | 2020                                                  | 19                                                                                                              |
| Switzerland                     | 68                                                                      | 2021                                                  | 22                                                                                                              |
| Sweden                          | 67                                                                      | 2020                                                  | 21                                                                                                              |
| Austria                         | 64                                                                      | 2019                                                  | 22                                                                                                              |
| Finland                         | 59                                                                      | 2020                                                  | 14                                                                                                              |
| Malaysia                        | 54                                                                      | 2021                                                  | 17                                                                                                              |
| Norway                          | 51                                                                      | 2020                                                  | 19                                                                                                              |
| Greece                          | 42                                                                      | 2020                                                  | 13                                                                                                              |
| Romania                         | 42                                                                      | 2019                                                  | 16                                                                                                              |
| Japan                           | 39                                                                      | 2015                                                  | 19                                                                                                              |
| Turkey                          | 37                                                                      | 2020                                                  | 20                                                                                                              |
| Russian Federation              | 33                                                                      | 2018                                                  | 17                                                                                                              |
| South Africa                    | 32                                                                      | 2020                                                  | 6                                                                                                               |
| South Korea                     | 32                                                                      | 2020                                                  | 16                                                                                                              |
| Colombia                        | 30                                                                      | 2021                                                  | 7                                                                                                               |
| Chile                           | 28                                                                      | 2021                                                  | 10                                                                                                              |
| Czech Republic                  | 27                                                                      | 2019                                                  | 13                                                                                                              |
| Iran                            | 26                                                                      | 2019                                                  | 8                                                                                                               |
| Egypt                           | 25                                                                      | 2019                                                  | 12                                                                                                              |
| Taiwan                          | 25                                                                      | 2019                                                  | 3                                                                                                               |
| Nigeria                         | 24                                                                      | 2018                                                  | 6                                                                                                               |
| Saudi Arabia                    | 23                                                                      | 2021                                                  | 13                                                                                                              |
| Pakistan                        | 22                                                                      | 2022                                                  | 11                                                                                                              |

**Table S16: Data for Figures 5C and 5D.** Data behind the visualisation of the co-occurrence between keywords (Figure 4C) and for the overlay visualisation of keyword occurrence over time (Figure 4D). Data collected from the Scopus search and sorted with the VOSviewer software.

| <b>Node Title<br/>(Keyword)</b>      | <b>Node size<br/>(Number of<br/>times the<br/>keyword occurs<br/>across all<br/>publications)</b> | <b>Number of lines<br/>to the node<br/>(Level of<br/>correlation the<br/>keywords have<br/>with one<br/>another)</b> | <b>Figure 5C node<br/>colour<br/>(Cluster –<br/>Keywords with<br/>similar subjects)</b> | <b>Figure 5D node<br/>colour<br/>(Average<br/>Publication year)</b> |
|--------------------------------------|---------------------------------------------------------------------------------------------------|----------------------------------------------------------------------------------------------------------------------|-----------------------------------------------------------------------------------------|---------------------------------------------------------------------|
| Life Cycle Assessment                | 465                                                                                               | 37                                                                                                                   | 1 (Red)                                                                                 | 2020                                                                |
| Waste Management                     | 387                                                                                               | 37                                                                                                                   | 2 (Green)                                                                               | 2020                                                                |
| Environmental Impact                 | 304                                                                                               | 37                                                                                                                   | 1                                                                                       | 2020                                                                |
| Construction And<br>Demolition Waste | 276                                                                                               | 37                                                                                                                   | 3 (Blue)                                                                                | 2021                                                                |
| Economics                            | 160                                                                                               | 37                                                                                                                   | 1                                                                                       | 2018                                                                |
| Waste Disposal                       | 136                                                                                               | 37                                                                                                                   | 2                                                                                       | 2018                                                                |
| Industrial Economics                 | 135                                                                                               | 34                                                                                                                   | 1                                                                                       | 2019                                                                |
| Architectural Design                 | 131                                                                                               | 34                                                                                                                   | 1                                                                                       | 2020                                                                |
| Energy Efficiency                    | 122                                                                                               | 34                                                                                                                   | 1                                                                                       | 2019                                                                |
| Energy Utilization                   | 121                                                                                               | 34                                                                                                                   | 1                                                                                       | 2019                                                                |
| Climate Change                       | 118                                                                                               | 37                                                                                                                   | 1                                                                                       | 2021                                                                |
| Economic Aspect                      | 117                                                                                               | 37                                                                                                                   | 2                                                                                       | 2021                                                                |
| Construction Sectors                 | 114                                                                                               | 37                                                                                                                   | 1                                                                                       | 2021                                                                |
| Greenhouse Gases                     | 114                                                                                               | 37                                                                                                                   | 1                                                                                       | 2020                                                                |
| Carbon Dioxide                       | 111                                                                                               | 36                                                                                                                   | 3                                                                                       | 2019                                                                |
| Concrete Aggregates                  | 110                                                                                               | 35                                                                                                                   | 3                                                                                       | 2020                                                                |
| Recycled Aggregate                   | 107                                                                                               | 33                                                                                                                   | 3                                                                                       | 2020                                                                |
| Carbon                               | 106                                                                                               | 37                                                                                                                   | 1                                                                                       | 2020                                                                |
| Decision Making                      | 104                                                                                               | 33                                                                                                                   | 1                                                                                       | 2020                                                                |
| Aggregate                            | 96                                                                                                | 35                                                                                                                   | 3                                                                                       | 2020                                                                |
| Landfill                             | 95                                                                                                | 35                                                                                                                   | 2                                                                                       | 2018                                                                |
| Cements                              | 93                                                                                                | 35                                                                                                                   | 3                                                                                       | 2020                                                                |
| Economic And Social<br>Effects       | 93                                                                                                | 35                                                                                                                   | 1                                                                                       | 2019                                                                |
| Fly Ash                              | 92                                                                                                | 33                                                                                                                   | 3                                                                                       | 2019                                                                |
| Building                             | 91                                                                                                | 34                                                                                                                   | 2                                                                                       | 2021                                                                |
| Waste Treatment                      | 91                                                                                                | 36                                                                                                                   | 2                                                                                       | 2018                                                                |
| Concretes                            | 90                                                                                                | 37                                                                                                                   | 3                                                                                       | 2018                                                                |
| Construction Material                | 90                                                                                                | 34                                                                                                                   | 2                                                                                       | 2020                                                                |
| Environmental<br>Management          | 89                                                                                                | 37                                                                                                                   | 1                                                                                       | 2020                                                                |
| Slags                                | 89                                                                                                | 31                                                                                                                   | 3                                                                                       | 2019                                                                |
| Gas Emissions                        | 86                                                                                                | 37                                                                                                                   | 1                                                                                       | 2019                                                                |
| Environmental<br>Economics           | 85                                                                                                | 35                                                                                                                   | 2                                                                                       | 2020                                                                |
| Industrial Waste                     | 84                                                                                                | 36                                                                                                                   | 2                                                                                       | 2020                                                                |
| Supply Chains                        | 84                                                                                                | 33                                                                                                                   | 1                                                                                       | 2020                                                                |
| Building Industry                    | 81                                                                                                | 36                                                                                                                   | 2                                                                                       | 2021                                                                |
| Environmental<br>Protection          | 81                                                                                                | 35                                                                                                                   | 2                                                                                       | 2017                                                                |
| Building Material                    | 78                                                                                                | 36                                                                                                                   | 2                                                                                       | 2020                                                                |
| Controlled Study                     | 72                                                                                                | 36                                                                                                                   | 2                                                                                       | 2020                                                                |

**Table S17: Data for Figure 6A.** Quantity of publications per year from the search of ‘Waste minimization OR waste minimisation OR zero waste AND construction’ on the Scopus database. Data collected on the 29th of May 2023.

| <b>Publication year</b> | <b>Quantity of publications</b> |
|-------------------------|---------------------------------|
| 1973                    | 1                               |
| 1974                    | 2                               |
| 1975                    | 5                               |
| 1976                    | 2                               |
| 1977                    | 1                               |
| 1979                    | 3                               |
| 1980                    | 1                               |
| 1983                    | 3                               |
| 1984                    | 2                               |
| 1985                    | 1                               |
| 1986                    | 1                               |
| 1987                    | 1                               |
| 1988                    | 5                               |
| 1989                    | 1                               |
| 1990                    | 4                               |
| 1991                    | 6                               |
| 1992                    | 3                               |
| 1993                    | 4                               |
| 1994                    | 4                               |
| 1995                    | 5                               |
| 1996                    | 12                              |
| 1997                    | 7                               |
| 1998                    | 3                               |
| 1999                    | 8                               |
| 2000                    | 13                              |
| 2001                    | 11                              |
| 2002                    | 12                              |
| 2003                    | 26                              |
| 2004                    | 19                              |
| 2005                    | 20                              |
| 2006                    | 39                              |
| 2007                    | 27                              |
| 2008                    | 45                              |
| 2009                    | 28                              |
| 2010                    | 25                              |
| 2011                    | 58                              |
| 2012                    | 49                              |
| 2013                    | 49                              |
| 2014                    | 51                              |
| 2015                    | 45                              |
| 2016                    | 61                              |
| 2017                    | 72                              |
| 2018                    | 69                              |
| 2019                    | 77                              |
| 2020                    | 118                             |
| 2021                    | 128                             |
| 2022                    | 161                             |
| 2023                    | 68                              |



**Table S18: Data for Figure 6B.** Data behind the overlay visualisation for the publication countries over time. Data collected from the Scopus search and sorted with the VOSviewer software.

| <b>Node Title<br/>(Country)</b> | <b>Node size<br/>(Number of<br/>publications found per<br/>country)</b> | <b>Node colour<br/>(Average Publication<br/>year)</b> | <b>Number of lines to the<br/>node<br/>(Level of corelation the<br/>publications have with<br/>one another)</b> |
|---------------------------------|-------------------------------------------------------------------------|-------------------------------------------------------|-----------------------------------------------------------------------------------------------------------------|
| United States                   | 169                                                                     | 2010                                                  | 19                                                                                                              |
| United Kingdom                  | 132                                                                     | 2015                                                  | 21                                                                                                              |
| India                           | 101                                                                     | 2018                                                  | 15                                                                                                              |
| Malaysia                        | 58                                                                      | 2017                                                  | 15                                                                                                              |
| Canada                          | 56                                                                      | 2013                                                  | 7                                                                                                               |
| Spain                           | 45                                                                      | 2015                                                  | 4                                                                                                               |
| Italy                           | 44                                                                      | 2019                                                  | 15                                                                                                              |
| Germany                         | 41                                                                      | 2012                                                  | 12                                                                                                              |
| Brazil                          | 39                                                                      | 2015                                                  | 10                                                                                                              |
| Egypt                           | 29                                                                      | 2018                                                  | 11                                                                                                              |
| Russian Federation              | 28                                                                      | 2017                                                  | 5                                                                                                               |
| Belgium                         | 22                                                                      | 2015                                                  | 11                                                                                                              |
| France                          | 22                                                                      | 2014                                                  | 11                                                                                                              |
| Iran                            | 22                                                                      | 2017                                                  | 5                                                                                                               |
| Nigeria                         | 22                                                                      | 2017                                                  | 8                                                                                                               |
| Japan                           | 20                                                                      | 2010                                                  | 5                                                                                                               |
| Poland                          | 19                                                                      | 2017                                                  | 5                                                                                                               |
| South Korea                     | 19                                                                      | 2019                                                  | 7                                                                                                               |
| Portugal                        | 18                                                                      | 2014                                                  | 7                                                                                                               |
| Turkey                          | 18                                                                      | 2016                                                  | 4                                                                                                               |
| Indonesia                       | 17                                                                      | 2018                                                  | 2                                                                                                               |
| Netherlands                     | 17                                                                      | 2015                                                  | 9                                                                                                               |
| New Zealand                     | 17                                                                      | 2015                                                  | 3                                                                                                               |
| Switzerland                     | 17                                                                      | 2018                                                  | 7                                                                                                               |
| Austria                         | 16                                                                      | 2017                                                  | 7                                                                                                               |
| Denmark                         | 14                                                                      | 2016                                                  | 8                                                                                                               |
| Norway                          | 14                                                                      | 2017                                                  | 4                                                                                                               |
| South Africa                    | 14                                                                      | 2018                                                  | 4                                                                                                               |
| Singapore                       | 13                                                                      | 2012                                                  | 3                                                                                                               |

**Table S19: Data for Figures 6C and 6D.** Data behind the visualisation of the co-occurrence between keywords (Figure 6C) and for the overlay visualisation of keyword occurrence over time (Figure 6D). Data collected from the Scopus search and sorted with the VOSviewer software.

| <b>Node Title<br/>(Keyword)</b> | <b>Node size<br/>(Number of<br/>times the<br/>keyword occurs<br/>across all<br/>publications)</b> | <b>Number of lines<br/>to the node<br/>(Level of<br/>corelation the<br/>keywords have<br/>with one<br/>another)</b> | <b>Figure 6C node<br/>colour<br/>(Cluster –<br/>Keywords with<br/>similar subjects)</b> | <b>Figure 6D node<br/>colour<br/>(Average<br/>Publication year)</b> |
|---------------------------------|---------------------------------------------------------------------------------------------------|---------------------------------------------------------------------------------------------------------------------|-----------------------------------------------------------------------------------------|---------------------------------------------------------------------|
| Waste management                | 313                                                                                               | 32                                                                                                                  | 2 (Green)                                                                               | 2014                                                                |
| Waste minimisation              | 208                                                                                               | 31                                                                                                                  | 2                                                                                       | 2012                                                                |
| Conservation                    | 164                                                                                               | 31                                                                                                                  | 2                                                                                       | 2015                                                                |
| Waste disposal                  | 162                                                                                               | 32                                                                                                                  | 3 (Blue)                                                                                | 2012                                                                |
| Life cycle assessment           | 126                                                                                               | 32                                                                                                                  | 1 (Red)                                                                                 | 2017                                                                |
| Environmental impact            | 120                                                                                               | 32                                                                                                                  | 1                                                                                       | 2013                                                                |

|                                   |     |    |   |      |
|-----------------------------------|-----|----|---|------|
| Construction and demolition waste | 107 | 30 | 2 | 2019 |
| Construction wastes               | 99  | 28 | 2 | 2015 |
| Landfill                          | 81  | 30 | 3 | 2011 |
| Energy utilization                | 73  | 30 | 1 | 2017 |
| Industrial waste                  | 72  | 30 | 3 | 2013 |
| Waste treatment                   | 70  | 30 | 1 | 2015 |
| Energy efficiency                 | 65  | 29 | 1 | 2016 |
| Project management                | 62  | 24 | 2 | 2013 |
| Architectural design              | 61  | 29 | 2 | 2017 |
| Priority journal                  | 60  | 31 | 3 | 2013 |
| Carbon dioxide                    | 58  | 30 | 1 | 2016 |
| Zero waste                        | 58  | 25 | 1 | 2018 |
| Optimization                      | 57  | 28 | 2 | 2011 |
| Building material                 | 56  | 30 | 3 | 2015 |
| Environmental protection          | 55  | 29 | 3 | 2007 |
| Solid wastes                      | 51  | 29 | 3 | 2011 |
| Fly ash                           | 49  | 27 | 1 | 2016 |
| Environmental management          | 47  | 30 | 1 | 2015 |
| Building industry                 | 45  | 26 | 3 | 2015 |
| Slags                             | 45  | 26 | 1 | 2018 |
| Costs                             | 44  | 30 | 1 | 2013 |
| Surveys                           | 44  | 24 | 2 | 2016 |
| Waste heat                        | 44  | 16 | 1 | 2017 |
| Carbon                            | 43  | 29 | 1 | 2018 |
| Cements                           | 41  | 27 | 1 | 2017 |
| Concretes                         | 41  | 28 | 1 | 2014 |
| Greenhouse gases                  | 41  | 29 | 1 | 2018 |

**Table S20: Data for Figure 7A.** Quantity of publications per year from the search of ‘Waste minimization OR waste minimisation OR zero waste’ on the Scopus database. Data collected on the 29th of May 2023.

| Publication year | Quantity of publications |
|------------------|--------------------------|
| 1943             | 1                        |
| 1944             | 1                        |
| 1961             | 1                        |
| 1963             | 2                        |
| 1964             | 1                        |
| 1965             | 2                        |
| 1966             | 2                        |
| 1967             | 2                        |
| 1968             | 1                        |
| 1969             | 6                        |
| 1970             | 5                        |
| 1971             | 9                        |
| 1972             | 8                        |
| 1973             | 27                       |
| 1974             | 35                       |
| 1975             | 46                       |
| 1976             | 29                       |

|      |       |
|------|-------|
| 1977 | 37    |
| 1978 | 27    |
| 1979 | 31    |
| 1980 | 38    |
| 1981 | 35    |
| 1982 | 28    |
| 1983 | 34    |
| 1984 | 42    |
| 1985 | 45    |
| 1986 | 53    |
| 1987 | 55    |
| 1988 | 84    |
| 1989 | 80    |
| 1990 | 109   |
| 1991 | 141   |
| 1992 | 110   |
| 1993 | 156   |
| 1994 | 177   |
| 1995 | 172   |
| 1996 | 204   |
| 1997 | 208   |
| 1998 | 206   |
| 1999 | 204   |
| 2000 | 234   |
| 2001 | 239   |
| 2002 | 252   |
| 2003 | 305   |
| 2004 | 321   |
| 2005 | 383   |
| 2006 | 405   |
| 2007 | 402   |
| 2008 | 446   |
| 2009 | 492   |
| 2010 | 533   |
| 2011 | 600   |
| 2012 | 574   |
| 2013 | 606   |
| 2014 | 691   |
| 2015 | 675   |
| 2016 | 830   |
| 2017 | 902   |
| 2018 | 1,001 |
| 2019 | 1,229 |
| 2020 | 1,469 |
| 2021 | 1,724 |
| 2022 | 2,024 |
| 2023 | 900   |
| 2024 | 2     |

**Table S21: Data for Figure 7B.** Data behind the overlay visualisation for the publication countries over time. Data collected from the Scopus search and sorted with the VOSviewer software.

| <b>Node Title<br/>(Country)</b> | <b>Node size<br/>(Number of<br/>publications found per<br/>country)</b> | <b>Node colour<br/>(Average Publication<br/>year)</b> | <b>Number of lines to the<br/>node<br/>(Level of corelation the<br/>publications have with<br/>one another)</b> |
|---------------------------------|-------------------------------------------------------------------------|-------------------------------------------------------|-----------------------------------------------------------------------------------------------------------------|
|---------------------------------|-------------------------------------------------------------------------|-------------------------------------------------------|-----------------------------------------------------------------------------------------------------------------|

|                    |      |      |    |
|--------------------|------|------|----|
| United States      | 3503 | 2007 | 29 |
| India              | 1745 | 2017 | 29 |
| United Kingdom     | 1270 | 2012 | 29 |
| Italy              | 836  | 2016 | 27 |
| Canada             | 669  | 2012 | 28 |
| Spain              | 649  | 2015 | 28 |
| Germany            | 625  | 2011 | 29 |
| Brazil             | 539  | 2016 | 22 |
| Japan              | 527  | 2011 | 29 |
| Malaysia           | 503  | 2017 | 27 |
| South Korea        | 456  | 2016 | 27 |
| France             | 399  | 2013 | 28 |
| Iran               | 373  | 2018 | 27 |
| Turkey             | 371  | 2016 | 23 |
| Poland             | 329  | 2017 | 24 |
| Taiwan             | 313  | 2013 | 20 |
| Netherlands        | 271  | 2013 | 26 |
| Russian Federation | 269  | 2017 | 26 |
| Indonesia          | 265  | 2019 | 17 |
| South Africa       | 261  | 2016 | 25 |
| Egypt              | 240  | 2018 | 25 |
| Greece             | 237  | 2016 | 24 |
| Sweden             | 237  | 2014 | 28 |
| Portugal           | 236  | 2016 | 22 |
| Saudi Arabia       | 232  | 2018 | 28 |
| Thailand           | 208  | 2017 | 20 |
| Belgium            | 201  | 2014 | 24 |
| Mexico             | 192  | 2015 | 19 |
| Denmark            | 178  | 2014 | 25 |
| Singapore          | 177  | 2015 | 21 |

**Table S22: Data for Figures 7C and 7D.** Data behind the visualisation of the co-occurrence between keywords (Figure 7C) and for the overlay visualisation of keyword occurrence over time (Figure 7D). Data collected from the Scopus search and sorted with the VOSviewer software.

| <b>Node Title<br/>(Keyword)</b> | <b>Node size<br/>(Number of<br/>times the<br/>keyword occurs<br/>across all<br/>publications)</b> | <b>Number of lines<br/>to the node<br/>(Level of<br/>corelation the<br/>keywords have<br/>with one<br/>another)</b> | <b>Figure 7C node<br/>colour<br/>(Cluster –<br/>Keywords with<br/>similar subjects)</b> | <b>Figure 7D node<br/>colour<br/>(Average<br/>Publication year)</b> |
|---------------------------------|---------------------------------------------------------------------------------------------------|---------------------------------------------------------------------------------------------------------------------|-----------------------------------------------------------------------------------------|---------------------------------------------------------------------|
| Waste management                | 2658                                                                                              | 46                                                                                                                  | 1 (Red)                                                                                 | 2012                                                                |
| Waste minimisation              | 1970                                                                                              | 44                                                                                                                  | 1                                                                                       | 2009                                                                |
| Wastewater treatment            | 1821                                                                                              | 46                                                                                                                  | 3 (Blue)                                                                                | 2013                                                                |
| Waste disposal                  | 1575                                                                                              | 46                                                                                                                  | 1                                                                                       | 2010                                                                |
| Iron                            | 1522                                                                                              | 46                                                                                                                  | 2 (Green)                                                                               | 2016                                                                |
| Waste water management          | 1482                                                                                              | 45                                                                                                                  | 3                                                                                       | 2010                                                                |
| Adsorption                      | 1435                                                                                              | 46                                                                                                                  | 2                                                                                       | 2016                                                                |
| Controlled study                | 1397                                                                                              | 45                                                                                                                  | 2                                                                                       | 2016                                                                |
| Wastewater                      | 1313                                                                                              | 46                                                                                                                  | 3                                                                                       | 2012                                                                |
| Ph                              | 1228                                                                                              | 45                                                                                                                  | 2                                                                                       | 2015                                                                |
| Waste treatment                 | 1156                                                                                              | 46                                                                                                                  | 1                                                                                       | 2013                                                                |
| Nonhuman                        | 1086                                                                                              | 45                                                                                                                  | 5 (Purple)                                                                              | 2014                                                                |
| Environmental impact            | 1031                                                                                              | 46                                                                                                                  | 1                                                                                       | 2011                                                                |
| Chemistry                       | 1028                                                                                              | 46                                                                                                                  | 4 (Yellow)                                                                              | 2017                                                                |

|                              |      |    |   |      |
|------------------------------|------|----|---|------|
| Water pollutants, chemical   | 1006 | 45 | 2 | 2017 |
| Waste water                  | 938  | 45 | 3 | 2013 |
| Sewage                       | 922  | 46 | 3 | 2015 |
| Water pollutant              | 887  | 45 | 2 | 2018 |
| Environmental protection     | 876  | 46 | 1 | 2004 |
| Optimization                 | 875  | 46 | 1 | 2012 |
| Conservation                 | 858  | 45 | 1 | 2015 |
| Water treatment              | 849  | 46 | 3 | 2012 |
| Pollutant removal            | 816  | 46 | 2 | 2017 |
| Biomass                      | 813  | 46 | 1 | 2016 |
| Oxidation                    | 793  | 46 | 2 | 2014 |
| Carbon                       | 790  | 46 | 1 | 2017 |
| Waste component removal      | 781  | 45 | 2 | 2016 |
| Carbon dioxide               | 779  | 46 | 1 | 2016 |
| Kinetics                     | 778  | 46 | 2 | 2014 |
| Waste heat                   | 751  | 32 | 1 | 2017 |
| Industrial waste             | 745  | 46 | 1 | 2010 |
| Scanning electron microscopy | 735  | 44 | 2 | 2018 |
| Human                        | 720  | 46 | 1 | 2015 |
| Procedures                   | 696  | 46 | 4 | 2018 |
| Temperature                  | 677  | 46 | 1 | 2015 |
| Iron nanoparticle            | 676  | 44 | 2 | 2019 |
| Water                        | 674  | 46 | 4 | 2015 |
| Unclassified drug            | 655  | 45 | 2 | 2016 |
| Effluents                    | 648  | 46 | 3 | 2013 |
| Landfill                     | 640  | 46 | 1 | 2011 |
| Zero waste                   | 633  | 44 | 1 | 2018 |
| Waste disposal, fluid        | 627  | 45 | 3 | 2014 |
| Energy efficiency            | 626  | 45 | 1 | 2016 |
| Water management             | 611  | 46 | 4 | 2015 |
| Life cycle assessment        | 608  | 46 | 1 | 2016 |
| Water purification           | 608  | 46 | 4 | 2015 |
| Zero-valent iron             | 601  | 42 | 2 | 2016 |

**Table S23: Data for Figure 9.** Average total publications per year (1960-2023), vs the weighted average year of publications, calculated from an average of total publication quantities from the VosViewer data of search 1-6. The average year of publication was weighted by the number of publications in the year. The top 21 countries are displayed.

| Keyword            | Weighted average year | Average total of occurrences (from searches 1-6) |
|--------------------|-----------------------|--------------------------------------------------|
| Belgium            | 2014.6818             | 22                                               |
| Egypt              | 2017.8276             | 29                                               |
| Malaysia           | 2017.8188             | 55.5                                             |
| Canada             | 2015.940833           | 62                                               |
| Brazil             | 2017.58816            | 63.8                                             |
| Japan              | 2013.9011             | 66.5                                             |
| Portugal           | 2018.00224            | 73.8                                             |
| France             | 2017.6039             | 76.66666667                                      |
| Denmark            | 2020.012              | 83                                               |
| Russian Federation | 2017.9286             | 84                                               |
| Netherlands        | 2016.497933           | 90.66666667                                      |
| Finland            | 2011.72               | 100                                              |
| Germany            | 2015.29765            | 102.8333333                                      |

|                |             |             |
|----------------|-------------|-------------|
| Australia      | 2017.3632   | 103.6666667 |
| India          | 2019.21218  | 111.4       |
| Hong Kong      | 2015        | 121         |
| Poland         | 2017.1484   | 128         |
| Spain          | 2017.0863   | 151         |
| United Kingdom | 2015.77115  | 160.8333333 |
| China          | 2018.365433 | 192         |
| Italy          | 2018.318117 | 195.6666667 |
| United states  | 2011.939667 | 228.1666667 |

**Table S24: Data for Figure 10.** The highest occurring keywords per development phase. The publications from search 1 were organised into three files according to their publication date and re-imported into VosViewer to create three smaller diagrams analysing the top 5-10 occurring keywords for each development phase.

| Node Title<br>(Keyword)           | Node size<br>(Number of times the keyword occurred from 1966 to 2002) | Node colour<br>(Average Publication year) | Node size<br>(Number of times the keyword occurred from 2003 to 2016) | Node colour<br>(Average Publication year) | Node size<br>(Number of times the keyword occurred from 2017 to 2023) | Node colour<br>(Average Publication year) |
|-----------------------------------|-----------------------------------------------------------------------|-------------------------------------------|-----------------------------------------------------------------------|-------------------------------------------|-----------------------------------------------------------------------|-------------------------------------------|
| Waste minimisation                | <i>Not meet threshold</i>                                             | <i>n/a</i>                                | <i>Not meet threshold</i>                                             | <i>n/a</i>                                | 17                                                                    | 2020                                      |
| Waste management                  | 7                                                                     | 1999                                      | 103                                                                   | 2011                                      | 190                                                                   | 2020                                      |
| Recycled aggregate                | <i>Not meet threshold</i>                                             | <i>n/a</i>                                | 44                                                                    | 2012                                      | 76                                                                    | 2020                                      |
| Material flow analysis            | <i>Not meet threshold</i>                                             | <i>n/a</i>                                | <i>Not meet threshold</i>                                             | <i>n/a</i>                                | 26                                                                    | 2020                                      |
| Mass balance                      | 3                                                                     | 1998                                      | <i>Not meet threshold</i>                                             | <i>n/a</i>                                | <i>Not meet threshold</i>                                             | <i>n/a</i>                                |
| Life cycle assessment             | <i>Not meet threshold</i>                                             | <i>n/a</i>                                | 42                                                                    | 2012                                      | 94                                                                    | 2020                                      |
| Landfill                          | 3                                                                     | 1997                                      | <i>Not meet threshold</i>                                             | <i>n/a</i>                                | <i>Not meet threshold</i>                                             | <i>n/a</i>                                |
| Environmental impact              | <i>Not meet threshold</i>                                             | <i>n/a</i>                                | 14                                                                    | 2011                                      | 24                                                                    | 2020                                      |
| Copper                            | 4                                                                     | 2001                                      | <i>Not meet threshold</i>                                             | <i>n/a</i>                                | <i>Not meet threshold</i>                                             | <i>n/a</i>                                |
| Construction and demolition waste | 6                                                                     | 2001                                      | 183                                                                   | 2012                                      | 365                                                                   | 2020                                      |
| Chromium                          | 3                                                                     | 2000                                      | <i>Not meet threshold</i>                                             | <i>n/a</i>                                | <i>Not meet threshold</i>                                             | <i>n/a</i>                                |
| Building information modelling    | <i>Not meet threshold</i>                                             | <i>n/a</i>                                | <i>Not meet threshold</i>                                             | <i>n/a</i>                                | 13                                                                    | 2020                                      |
| Aggregate                         | <i>Not meet threshold</i>                                             | <i>n/a</i>                                | 9                                                                     | 2011                                      | <i>Not meet threshold</i>                                             | <i>n/a</i>                                |

**Table S25: Data for Figure 11.** Total occurrences of the keywords (1966 – 2023) vs the weighted average year of publication, calculated from the VosViewer data from search 1. The top 9 occurring keywords have been displayed. In addition, three other keywords of interest are shown: Zero Waste, Green Building, and Embodied E. (embodied energy).

| Keyword              | Weighted average year | Total of occurrences |
|----------------------|-----------------------|----------------------|
| C&DW                 | 2017.3231             | 554                  |
| Waste Management     | 2016.6667             | 300                  |
| LCA                  | 2018.1615             | 130                  |
| Recycled Aggregate   | 2016.7500             | 120                  |
| Environmental Impact | 2016.4615             | 49                   |

|                        |           |    |
|------------------------|-----------|----|
| Material Flow Analysis | 2017.4571 | 35 |
| Waste Minimisation     | 2015.1111 | 27 |
| Aggregate              | 2014.7647 | 17 |
| BIM                    | 2019.1250 | 16 |
| Zero Waste             | 2019.4286 | 7  |
| Green Building         | 2019.7143 | 7  |
| Embodied E.            | 2016.0000 | 6  |
